# Supplementary material
Source: publisher site journal article supplement (https://en-cdn.bio-protocol.org/attached/file/20220406/Appendix.docx)
Supplement: Supplementary file 1 [file Appendix.docx]

**Appendix**

ÄKTAxpress Glycoprotein Purification Programme

*(Main)*

*0.00 Base CV 5.027 {ml} HisTrap_FF_5_ml*

*0.00 Block Set_up_System_1*

*(Set_up_System_1)*

*0.00 Base SameAsMain*

*0.00 ResetFracPosition*

*0.00 PumpWash A1*

*0.00 SystemWash 10.00 {ml}*

*0.00 Alarm_Pressure Enabled 0.7 (*[*Dhama et al.*](#_ENREF_2)*) 0.000 (*[*Dhama et al.*](#_ENREF_2)*)*

*0.00 Flow 8 {ml/min} Buffer 0.10 {ml/min} Yes*

*0.00 ColumnPosition Position1*

*0.00 Set_Mark “Equilibration of His Column 1”*

*3.00 AutoZeroUV*

*3.00 ColumnPosition Bypass*

*3.00 Flow 0.00 {ml/min} Buffer 0.10 {ml/min} No*

*3.00 End_Block*

*0.00 Watch_AirSensor Equal 1 Finish_load_1 (Finish_load_1)*

*0.00 Base Volume*

*0.00 InletValve A1*

*0.00 Flow 0.00 {ml/min} Buffer 0.10 {ml/min} No 0.00 Block Air_removal_1*

*(Air_removal_1)*

*0.00 Base Volume*

*0.00 InletValve A1*

*0.00 Set_Mark “Air removal”*

*0.00 InjectionValve Waste*

*0.00 Flow 20 {ml/min} Buffer 0.10 {ml/min} Yes 20.00 End_Block*

*0.00 Block Wash_Column_1*

*(Wash_Column_1)*

*0.00 Base SameAsMain*

*0.00 Set_Mark “Washing column 1”*

*0.00 Flow 0.00 {ml/min} Buffer 0.10 {ml/min} No 0.00 Watch_Off AirSensor*

*0.00 Alarm_AirSensor Enabled*

*0.00 InjectionValve Inject*

*0.00 Flow 5.00 {ml/min} Buffer 0.10 {ml/min} Yes 10.00 AutoZeroUV*

*10.00 End_Block*

*0.00 Block End_fractionation_load_1 (End_fractionation_load_1)*

*0.00 Base SameAsMain*

*0.00 OutletValve WasteF1*

*0.00 End_Block*

*0.00 Block Set_up_elution_1*

*(Set_up_elution_1)*

*0.00 Base SameAsMain*

*0.00 ColumnPosition Bypass 0.00 PumpWash A3*

*0.00 OutletValve LoopFracF12 0.00 LoopSelection Bypass 0.00 ColumnPosition Position1 0.00 End_Block*

*0.00 Block Elution_Peak*

*(Elution_Peak)*

*0.00 Base SameAsMain 5.027 {ml} HisTrap_HP_5_ml*

*0.00 Watch_UV Greater_Than 100.000 (*[*Wec et al.*](#_ENREF_15)*) Peak_Collection*

*(Peak_Collection)*

*0.00 Base Volume*

*0.00 LoopSelection LP1*

*0.00 Set_Mark “Peak_Start”*

*0.00 Watch_UV Less_Than 100.000 (*[*Wec et al.*](#_ENREF_15)*) Peak_End*

*(Peak_End)*

*0.00 Base Volume*

*0.00 LoopSelection Bypass 0.00 Set_Mark “Peak_End” 0.00 End_Block*

*7.50 Block Peak_End*

*(Peak_End)*

*0.00 Base Volume*

*0.00 LoopSelection Bypass 0.00 Set_Mark “Peak_End” 0.00 End_Block*

*7.50 End_Block*

*5.00 Watch_Off UV*

*5.00 LoopSelection Bypass 5.00 End_Block*

*0.00 Block Set_up_Gel_Filtration*

*(Set_up_Gel_Filtration)*

*0.00 Base SameAsMain*

*0.00 Flow 0.00 {ml/min} Buffer 0.10 {ml/min} No 0.00 ColumnPosition Bypass*

*0.00 OutletValve WasteF1*

*0.00 PumpWash A4*

*0.00 SystemWash 10.00 {ml}*

*0.00 Alarm_Pressure Enabled 0.5 (*[*Dhama et al.*](#_ENREF_2)*) 0.000 (*[*Dhama et al.*](#_ENREF_2)*) 0.00 Alarm_AirSensor Enabled*

*0.00 Flow 1.2 {ml/min} Buffer 0.10 {ml/min} Yes 0.00 End_Block*

*0.00 Block Equilibrate_Gel_Filtration*

*(Equilibrate_Gel_Filtration)*

*0.00 Base CV 120.637 {ml} HiLoad_16/60_Superdex_75_prep_grade 0.00 ColumnPosition Position5*

*0.10 AutoZeroUV*

*0.10 End_Block*

*0.00 Block Gel_Filtration*

*(Gel_Filtration)*

*0.00 Base CV 120.637 {ml} HiLoad_16/60_Superdex_75_prep_grade 0.00 Block Inject_Peak*

*(Inject_Peak)*

*0.00 Base Volume*

*0.00 InjectionValve Reinject 0.00 LoopSelection LP1*

*0.00 Set_Mark “Peak_injection” 10.00 InjectionValve Inject 10.00 End_Block*

*0.30 Block Fractionation_Gel_Filtration*

*(Fractionation_Gel_Filtration)*

*0.00 Base CV 120.637 {ml} HiLoad_16/60_Superdex_75_prep_grade 0.00 OutletValve FracCollF2*

*0.00 Fractionation 2.000 {ml}*

*0.00 End_Block 1.10 End_Block 0.00 End_Method*

*0.00 Block Fractionation_load_1 (Fractionation_load_1)*

*0.00 Base SameAsMain*

*0.00 OutletValve F3*

*0.00 End_Block*

*0.00 Block Load_Sample_1*

*(Load_Sample_1)*

*0.00 Base Volume*

*0.00 Flow 8 {ml/min} Buffer 0.10 {ml/min} Yes 0.00 ColumnPosition Position1*

*0.00 Set_Mark “Loading sample 1”*

*0.00 Loop (200)#No_of_loops_for_load*

*0.00 InletValve A2 (50.00)#Volume_of_part_sample InletValve A1 60.00 Loop_End*

*60.00 End_Block*

*0.00 Message “The programme finished but there is still sample!!” Screen “error” 0.00 End_Method*
